# Supplementary material for: Reproductive Carrier Screening for Genes Associated with Hereditary Deafness in 9993 Chinese Individuals
Source: Preprints.org preprint supplement (doi:10.20944/preprints202310.1567.v1), 2023-10-25
Supplement: Supplementary file 1 [file supplementary]

## Sheet: Table S1 Variant spectrum of GJ
Table S1 Variant spectra of GJB2 gene
Gene	Variant	Count
GJB2	c.109G>A (p.Val37Ile)	2
	c.176_191del (p.Gly59fs)	11
	c.139G>T (p.Glu47*)	4
	c.235delC (p.Leu79Cysfs)	185
	c.257C>G (p.Thr86Arg)	2
	c.299_300del (p.His100fs)	57
	c.35_36insG (p.Val13Cysfs*35)	2
	c.35G>T (p.Gly12Val)	1
	c.416G>A (p.Ser139Asn)	1
	c.427C>T (p.Arg143Trp)	1
	c.439G>A (p.Glu147Lys)	1
	c.508_511dupAACG (p.Ala171Glufs*40)	7
	c.560_605dupAGAAGACTGTCTTCACAGTGTTCATGATTGCAGTGTCTGGAATTTG (p.Cys202*)	2
	c.583A>G (p.Met195Val)	4
GJB2 / SLC26A4	c.235delC (p.Leu79Cysfs) / c.1720G>A (p.Ala574Thr)	1
	c.235delC (p.Leu79Cysfs) / c.2168A>G (p.His723Arg)	1
	c.235delC (p.Leu79Cysfs) / c.919-2A>G	1
	c.299_300del (p.His100fs) / c.2168A>G (p.His723Arg)	1
	c.416G>A (p.Ser139Asn) / c.1229C>T (p.Thr410Met)	1
	c.235delC (p.Leu79Cysfs) / c.230A>T (p.Lys77Ile) + c.1174A>T (p.Asn392Tyr)	1

## Sheet: Table S2 Variant spectrum of SL
Table S2 Variant spectra of SLC26A4 gene
Gene	Variant	Count
SLC26A4	c.1003T>C (p.Phe335Leu)	1
	c.1124A>G (p.Tyr375Cys)	1
	c.1150-2A>T	1
	c.1174A>T (p.Asn392Tyr)	13
	c.1174A>T (p.Asn392Tyr) / c.230A>T (p.Lys77Ile)	1
	c.1181_1183delTCT (p.Phe394del)	2
	c.1225C>T (p.Arg409Cys)	1
	c.1226G>A (p.Arg409His)	3
	c.1229C>T (p.Thr410Met)	19
	c.1262A>C (p.Gln421Pro) / c.919-2A>G	1
	c.1264-12T>A	3
	c.1334T>G (p.Leu445Trp)	2
	c.1336C>T (p.Gln446*)	2
	c.1343C>T (p.Ser448Leu)	2
	c.1520delT (p.Leu507*)	2
	c.1586T>G (p.Ile529Ser)	1
	c.1594A>C (p.Ser532Arg)	1
	c.1595G>T (p.Ser532Ile)	1
	c.1692dup (p.Cys565fs)	5
	c.1707+5G>A	2
	c.1720G>A (p.Ala574Thr)	7
	c.1975G>C (p.Val659Leu)	1
	c.1982_1996delinsGG (p.Asp661Glyfs*9)	1
	c.1991C>T (p.Ala664Val)	2
	c.2000T>C (p.Phe667Ser)	4
	c.2006A>T (p.Asp669Val)	1
	c.2027T>A (p.Leu676Gln)	5
	c.203T>C (p.Leu68Pro)	1
	c.2086C>T (p.Gln696*)	1
	c.2168A>G (p.His723Arg)	19
	c.2183_2187delATCTA (p.Tyr728Serfs*24)	1
	c.2235+2T>A	1
	c.227C>T (p.Pro76Leu)	1
	c.235C>T (p.Arg79Ter)	1
	c.249G>A (p.Trp83*)	2
	c.281C>T (p.Thr94Ile)	2
	c.2T>G (-)	1
	c.327delT (p.Ala110Glnfs*16)	1
	c.334C>T (p.Pro112Ser)	5
	c.349C>T (p.Leu117Phe)	1
	c.387delC (p.Phe130Leufs*15)	1
	c.439A>G (p.Met147Val)	2
	c.440T>C (p.Met147Thr)	1
	c.589G>A (p.Gly197Arg)	3
	c.668T>C(p.Phe223Ser)	1
	c.68C>A (p.Ser23*)	2
	c.697G>C (p.Val233Leu)	17
	c.754T>C (p.Ser252Pro)	1
	c.812A>G (p.Asp271Gly)	1
	c.919-2A>G	105
	c.919-2A>G / c.281C>T (p.Thr94Ile)	1
SLC26A4 / GJB2	c.1229C>T (p.Thr410Met) / c.416G>A (p.Ser139Asn)	1
	c.1720G>A (p.Ala574Thr) / c.235delC (p.Leu79Cysfs)	1
	c.2168A>G (p.His723Arg) / c.299_300del (p.His100fs)	1
	c.2168A>G (p.His723Arg) / c.235delC (p.Leu79Cysfs)	1
	c.919-2A>G / c.235delC (p.Leu79Cysfs)	1
	c.230A>T (p.Lys77Ile) + c.1174A>T (p.Asn392Tyr) / c.235delC (p.Leu79Cysfs)	1
